# Supplementary material for: Agent-based computational modeling of glioblastoma predicts that stromal density is central to oncolytic virus efficacy
Source: PubMed Central journal article supplement — iScience. 2022 May 13;25(6):104395. doi: 10.1016/j.isci.2022.104395 (PMC9142563; doi:10.1016/j.isci.2022.104395), 2022-05-13
Supplement: mmc1.pdf [file mmc1.pdf]

iScience, Volume 25

## **Supplemental information**

### **Agent-based computational modeling of glioblastoma predicts that stromal density is central to oncolytic virus efficacy**

**Adrienne L. Jenner, Munisha Smalley, David Goldman, William F. Goins, Charles S. Cobbs, Ralph B. Puchalski, E. Antonio Chiocca, Sean Lawler, Paul Macklin, Aaron Goldman, and Morgan Craig**

SUPPLEMENTARY FIGURES

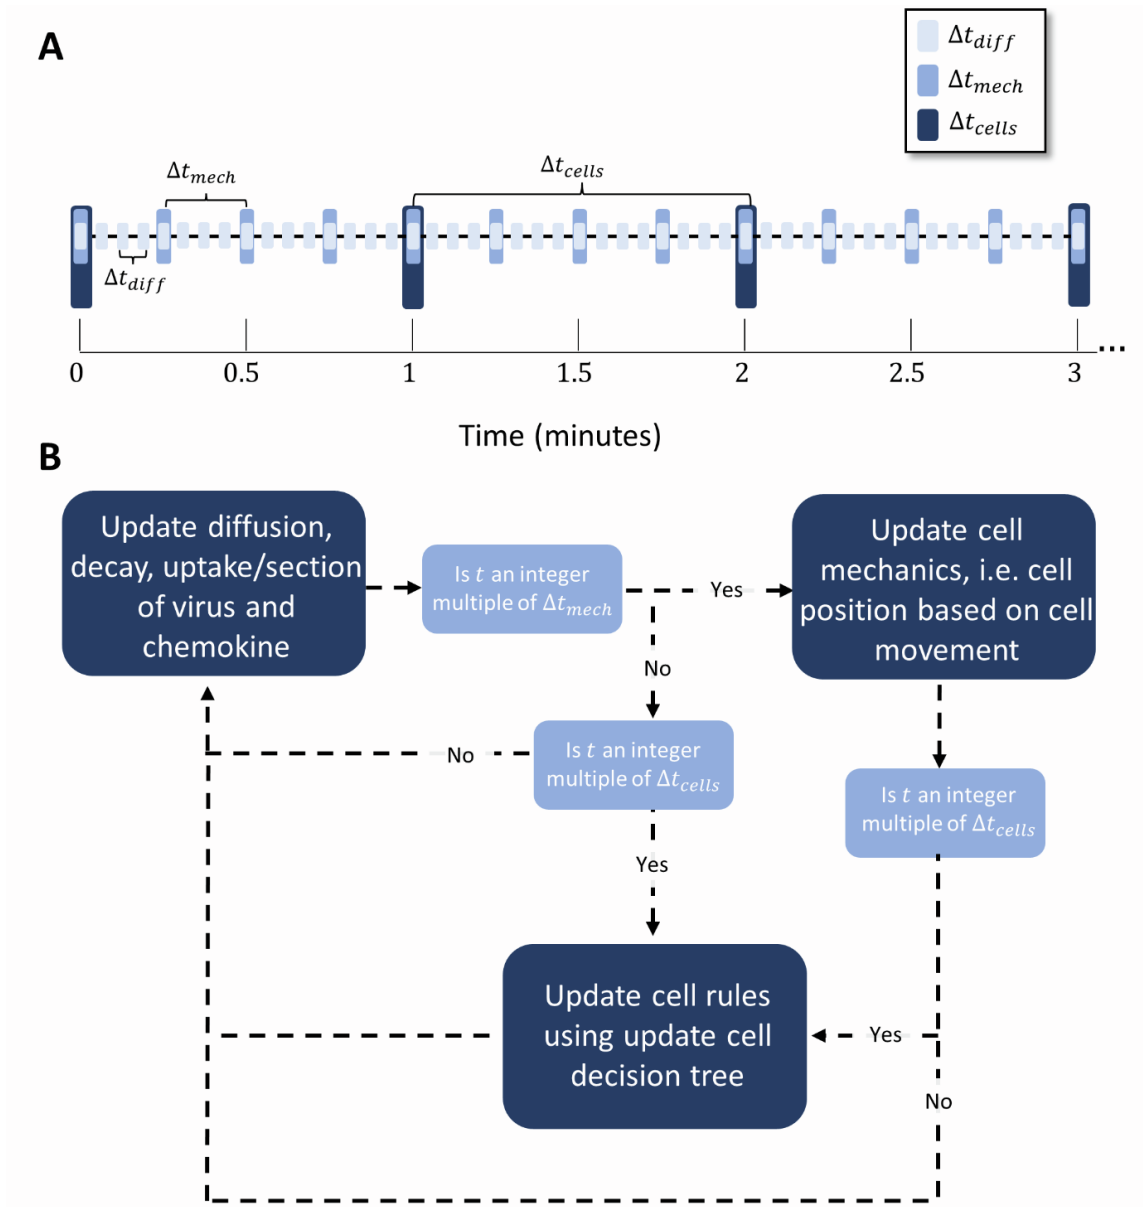

**Figure S1. Summary of the time scales in PhysiCell and the overarching model evolution, related to Table 1.** (A) PhysiCell uses multiple time scales or time steps to update the model. To update diffusion, decay, uptake and secretion of substrates in BioFVM, it uses the  $\Delta t_{diff}$ .  $\Delta t_{mech}$  is used to update cell mechanics (including cell positions). To update cell volume, death, infection, it uses  $\Delta t_{cell}$ . This image is a recreation of the original image summarizing these time steps published by Ghaffarizadeh et al. (2018). Note the time-scales depicted here are not the true time scale values used in the simulation and were chosen to as to demonstrate the evolution of the algorithm. The true time steps can be found in the **STAR Methods**. (B) A decision tree that complements the schematic in (A), depicting how the computational algorithm checks whether given the current time  $t$  it should update only the diffusive processes of virus and chemokine, or whether it should also update the cell mechanics (cell movement) and/or cell rules. The decision tree the algorithm follows when updating the cell rules can be found in **Figure S2**.

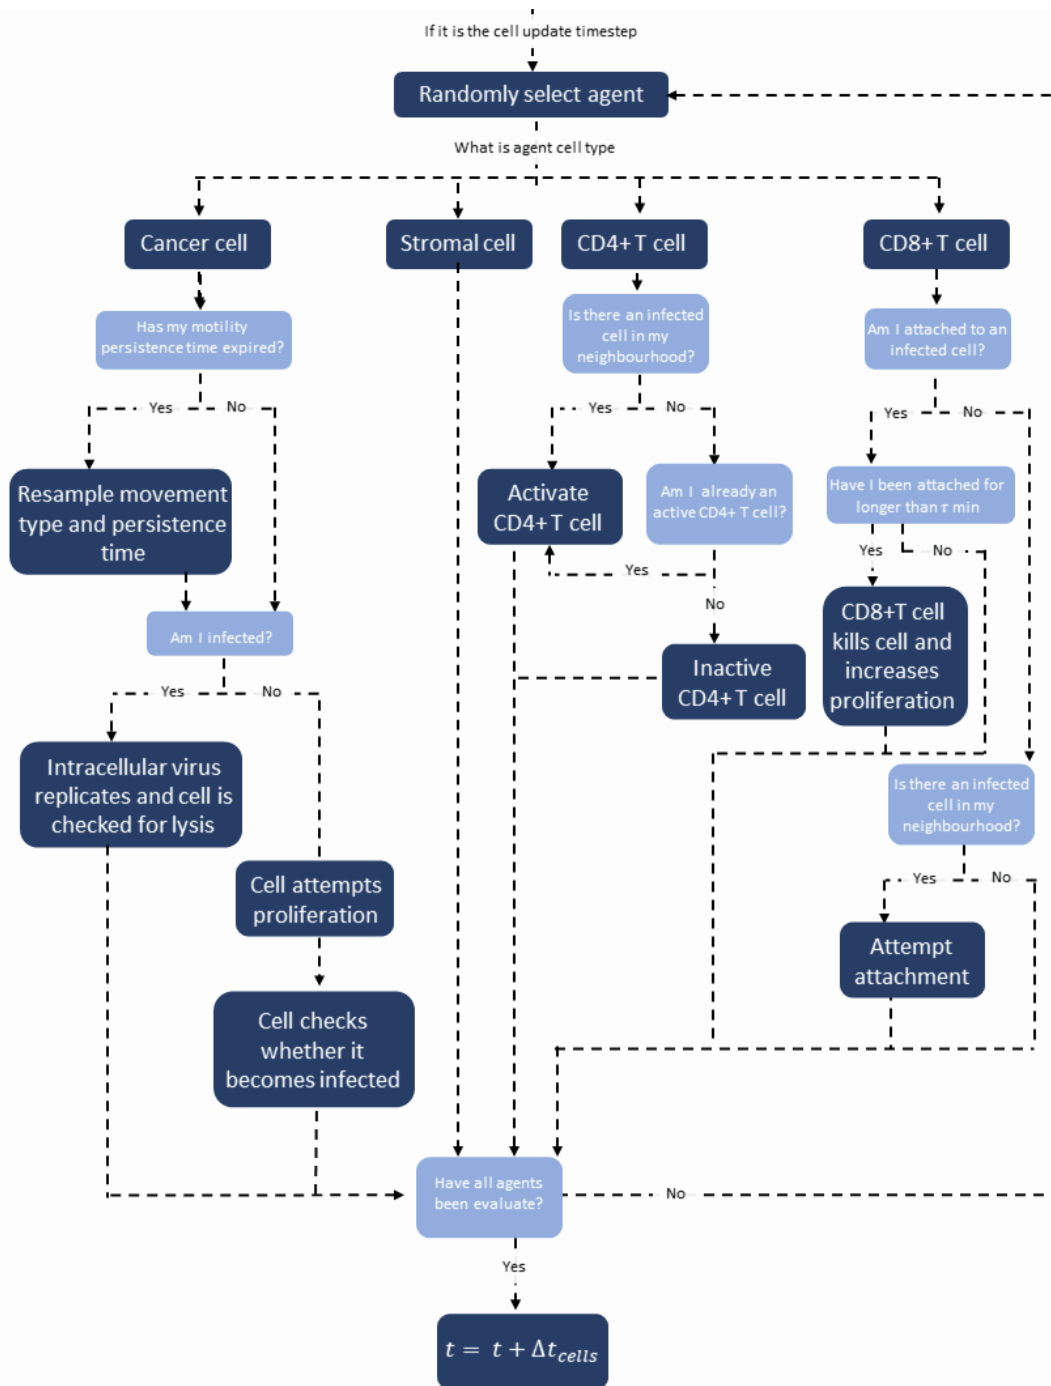

**Figure S2. Decision tree for the cell update time step  $\Delta t_{cell}$ , related to Table 1.** When the model has reached a time  $t$  that is a multiple of the cell update time step  $\Delta t_{cell}$ , the cells are updated. To update cells the process in the tree is followed. See **Figure S1** For details on how this time step relates to the diffusion and the diffusion time step and cell mechanics time step  $\Delta t_{diff}$  and  $\Delta t_{mech}$ . These times steps and their integration and built into the PhysiCell software and more details can be found at Ghaffarizadeh et al. (2018) or in the **STAR Methods**.

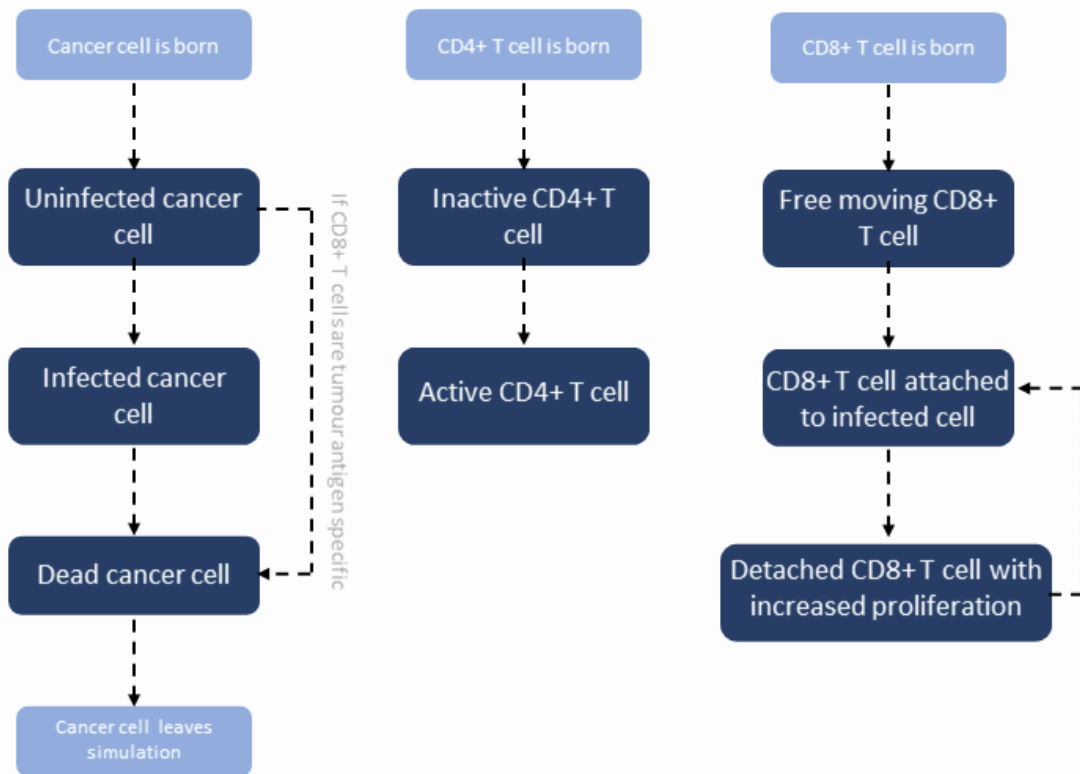

**Figure S3. Hierarchy for cell types and their phenotypes in the model, related to Table 1.** Cells move through stages dependent on environment stimuli. Cancer cells start as uninfected cancer cells. They can then become infected and die or if CD8+ T cells are tumour antigen specific they can die without becoming infected. CD4+ T cells start inactive and then become activated by infected cells. CD8+ T cells start off as free-moving cells, they then attach to infected cells and detach. After detaching they increase their proliferation and then can reattach to another infected cell.



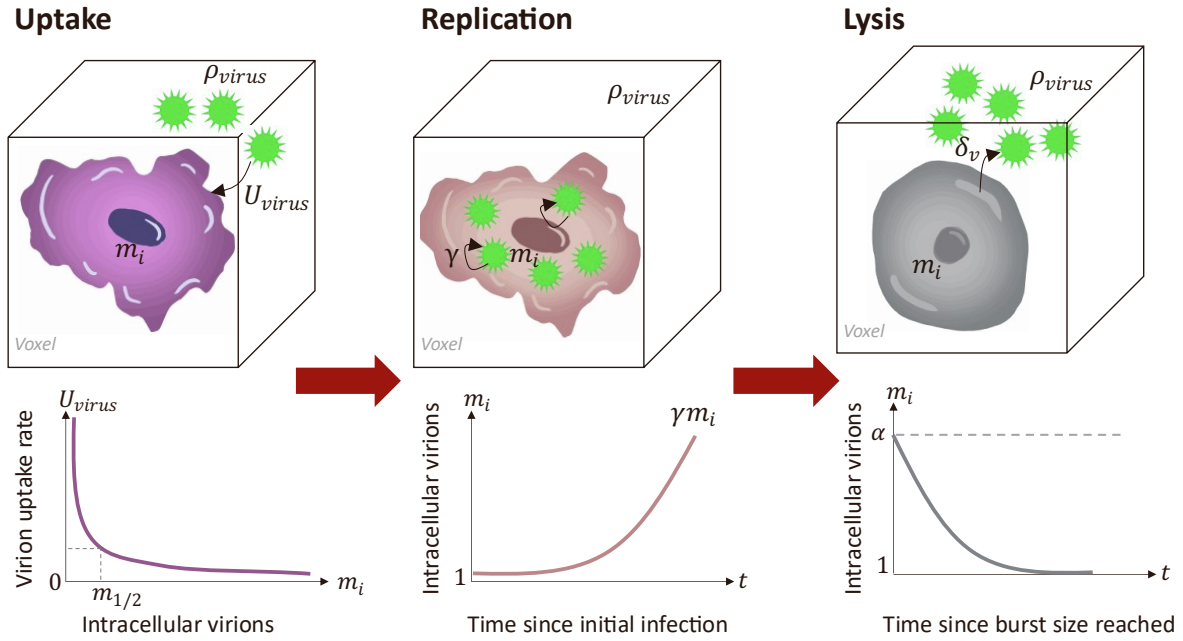

**Figure S4. Schematic describing the intracellular virus model, related to Figure 2.** Extracellular virus was modelled to be bound and internalised into the  $i^{\text{th}}$  cell based on the local voxel concentration of virus  $p_{v_i}$  and the amount of intracellular virus  $m_i$ . The virus then replicates within the cell at a rate  $\gamma$  proportional to the concentration of virus in that cell before undergoing lysis once the intracellular concentration of virus exceeds  $\alpha$ . Intracellular virus is then secreted into the extracellular domain at rate  $\delta_v$ . Further details of the model and equations can be found in the **STAR Methods**.

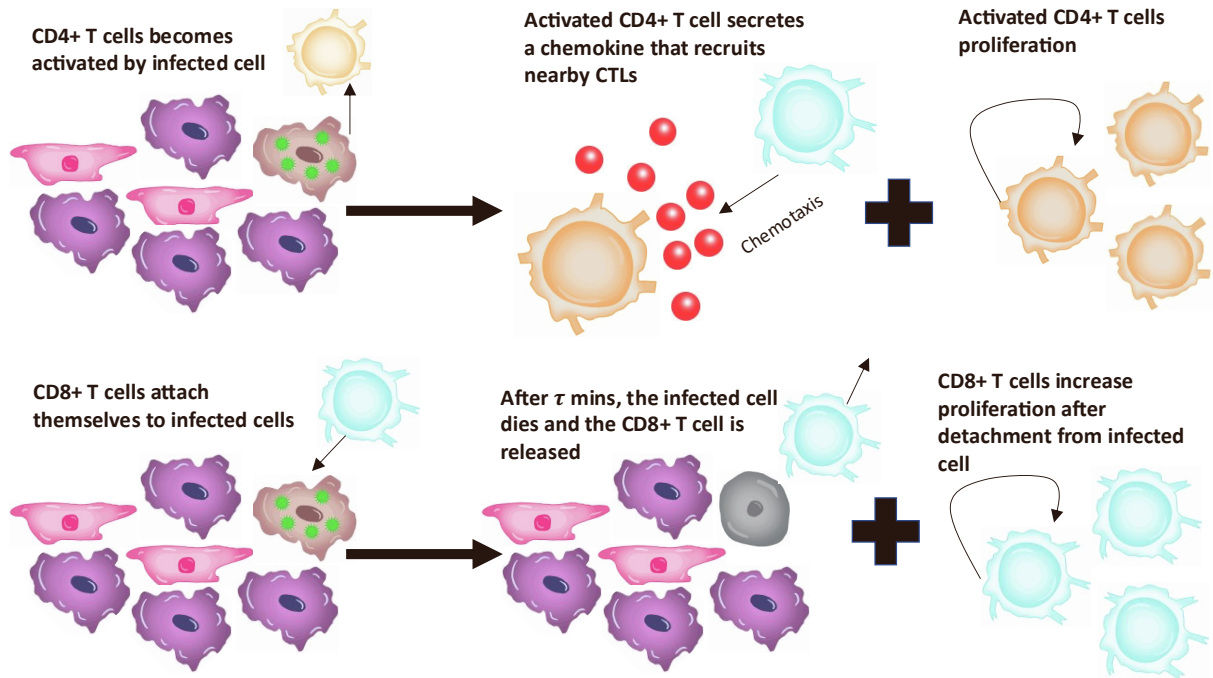

**Figure S5. Model of the CD4+ and CD8+ T cells interactions and stimulation by infected cells, related to Figure 2.** CD4+ T cells become activated if there is an infected cell in their neighbourhood of radius  $R_{TH}$  (Figure S24). They then secrete a cytokine, which we call the CD4+ T cell chemokine, at rate  $\psi_{TH}$  and which then diffuses at a rate  $D_{TH}$ . CD8+ T cells chemotaxis towards high concentrations of this cytokine and kill an infected cell if they are within  $50\mu m$  of that cell.

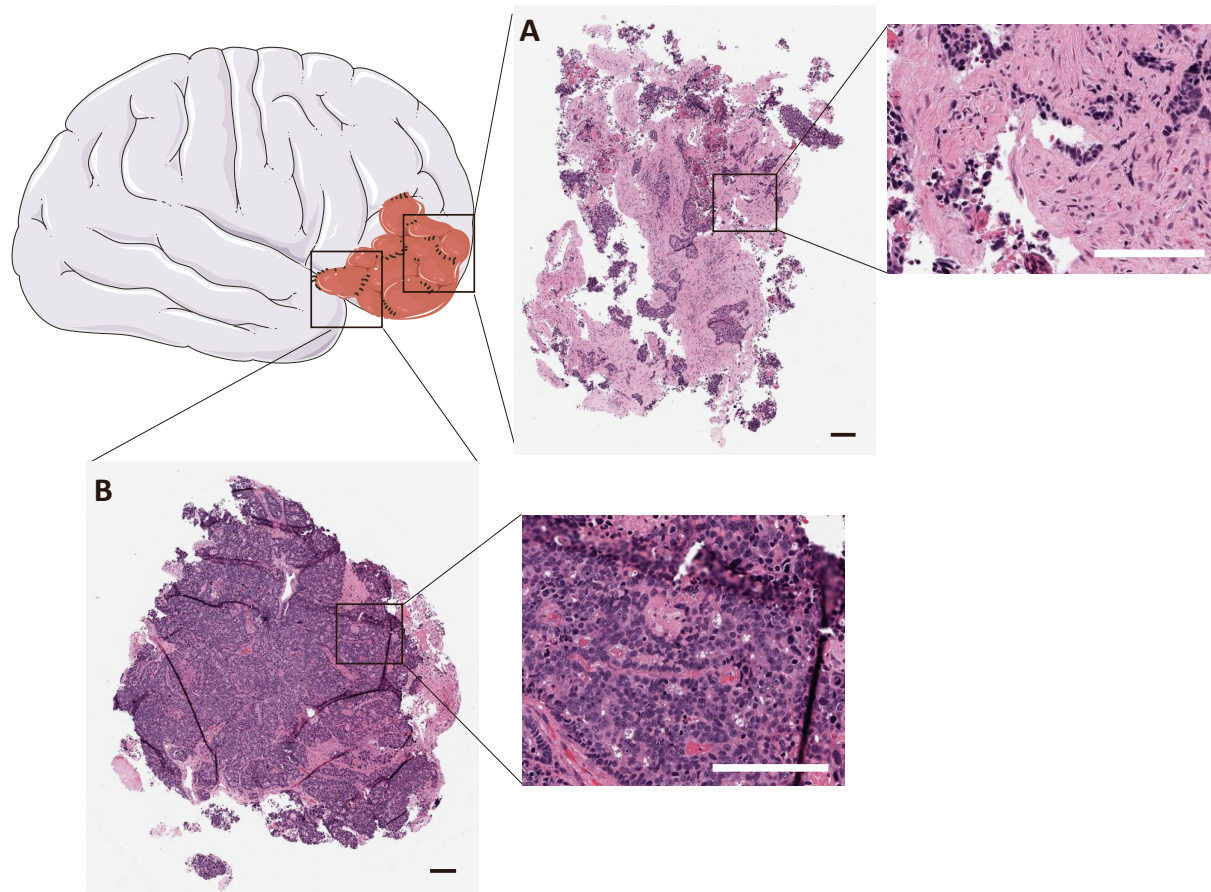

**Figure S6. Zoomed inserts of patient-derived resected glioblastoma from Figure 2B (main text), related to Figure 2.** A patient-derived resected glioblastoma was sub-sectioned into two smaller slices, which were then formalin fixed, paraffin embedded, sectioned onto slide, and stained with hematoxylin and eosin (H&E). Scale bar full image =  $750\mu\text{m}$ , scale bar of inset =  $120\mu\text{m}$ . Stained purple cells are glioblastoma tumour cells and stained pink regions denote non-cancerous tissue (or stroma). A clinical pathologist scored the fraction of tumour cell, necrosis, immune cell, and stroma content (**Table 2** Main Text).

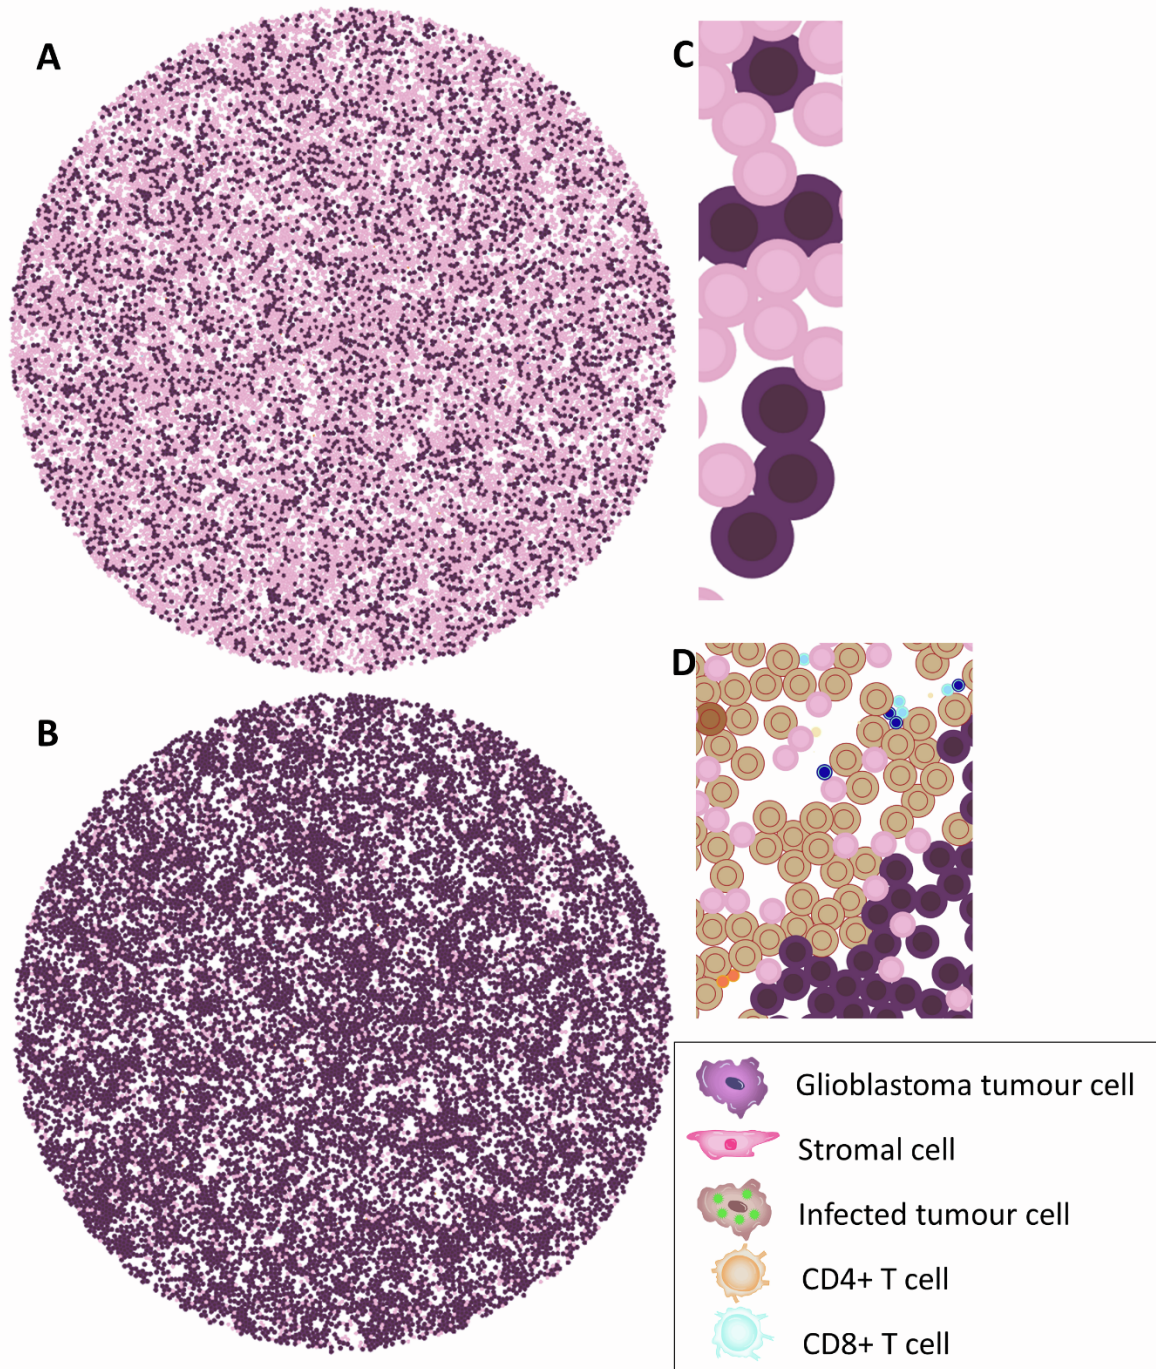

**Figure S7. Close up of the sparse and dense fragment configuration, related to Figure 2.** (A) Sparse and (B) dense fragments informed by pathologist scores (Table 2 Main Text) with the number of stromal cells and glioblastoma cells in each fragment calculated using the cross-sectional area of cells and the percentage of the fragment designated by the pathologist as tumour cells. Pink cells: stromal cells; Purple cells: glioblastoma cells. These are reproductions of Figure 2B. (C) Close up of the cells in the sparse fragment. (D) Immune cell action during infection for CD4+T cells (orange) and CD8+T cells (blue). Dark and light colouring correspond to whether the cells are proliferative (Ki67+) or non-proliferative (Ki67-).



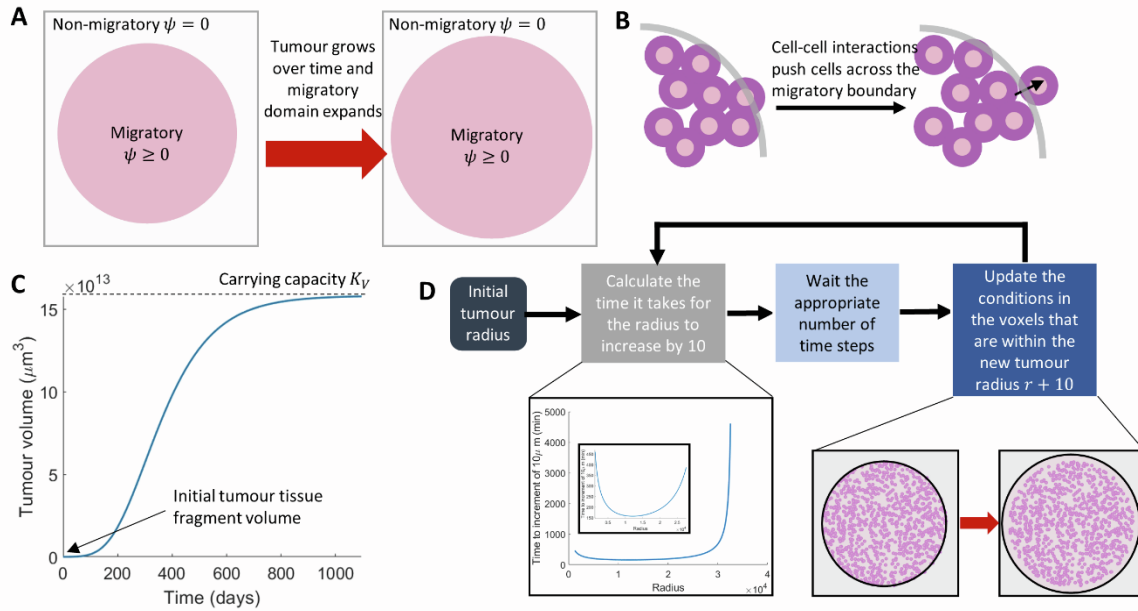

**Figure S8. Migratory and non-migratory domain expansion, related to Figure 2.** (A) Illustration of the subdivision of the domain into migratory and non-migratory areas. We expanded the tumour boundary over time to allow for the motility area for the cells to increase. (B) At the migratory boundary, glioblastoma and stromal cells were modelled as being pushed into areas where the motility is zero and, once there, they unable move again unless pushed. As the boundary expands, cells in an area previously designated non-migratory are able to migrate again. (C) From the initial fragment size, the Gompertz growth with parameters matched to MRIs of glioblastoma growth Stensjøen et al. (2015) and (2018) shows slow initial growth that takes about 3 years to reach carrying capacity. In our simulations, we used the initial growth to approximate the expansion of the fragment’s radius by changing the migratory and non-migratory domains (A). (D) For a given initial tumour radius  $R$ , we calculated the time to each  $10\mu\text{m}$  increase in the tumour boundary  $t_{\Delta r=10\mu\text{m}}$  and then updated the radius of the non-migratory boundary.

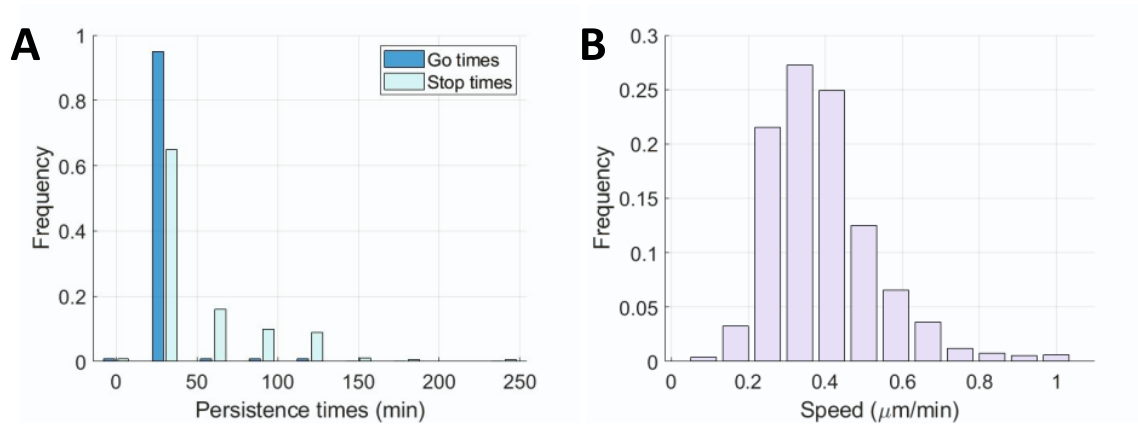

**Figure S9. Extrapolating the distributions for glioblastoma cell speed and persistence time from Gallaher et al. (2020), related to Table 1.** (A) The distribution for the persistence time  $T$  of cells that are moving (“go cells”) and cells that are not moving (“stopped cells”). (B) The distribution for the speed of glioblastoma cells in the population. The data was reproduced from Gallaher et al. (2020) combining their phenotypic distributions.

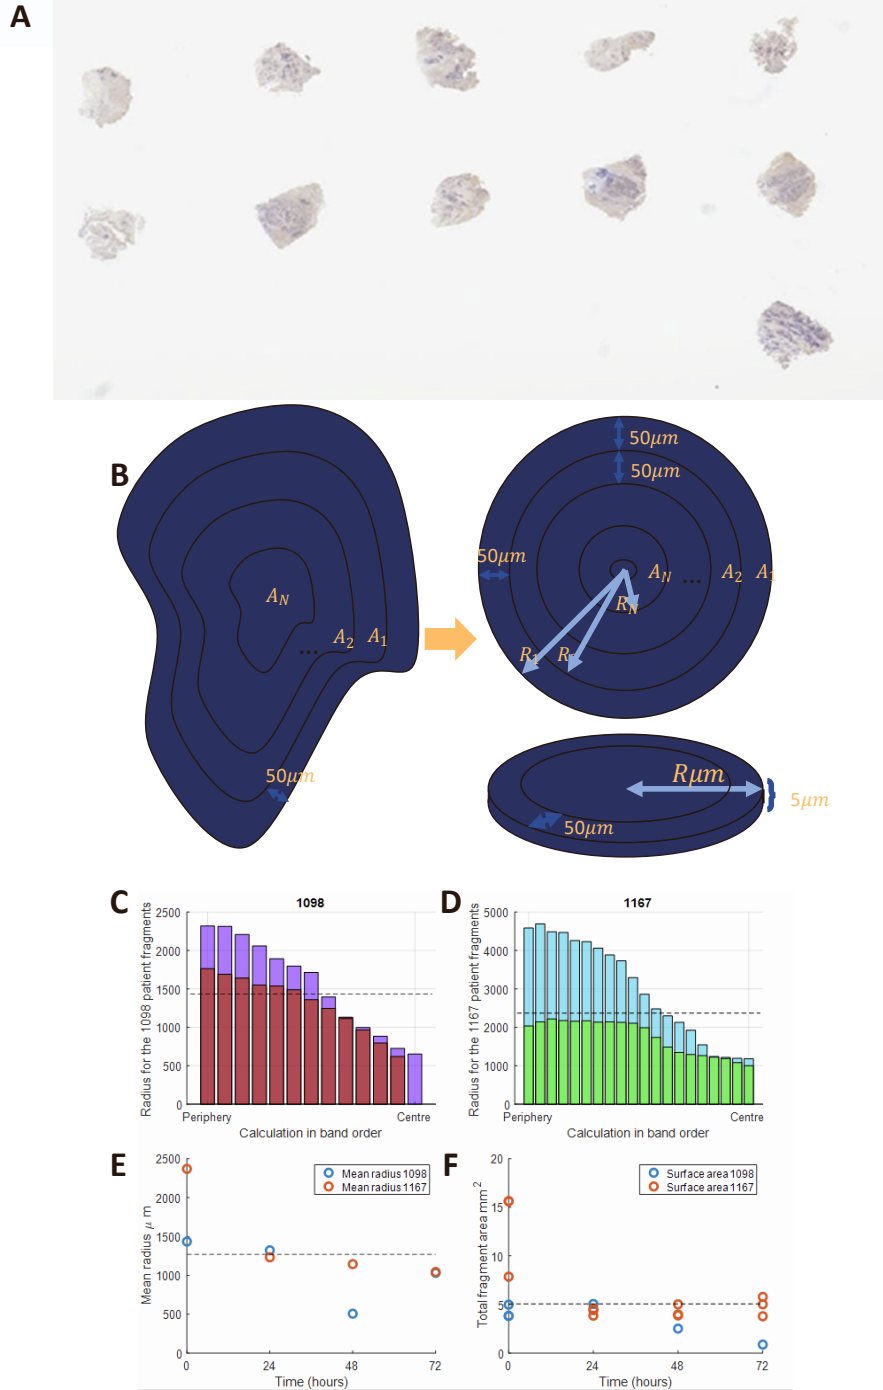

**Figure S10. Extrapolating tumour slice radius from HALO measurements, related to Figure 3.** (A) Selection of images of  $5\mu\text{m}$  thick slices obtained from our CANscript samples (Figure 1 Main Text). (B) Schematic representation of the domain and area circular approximation for the slices. Bands  $50\mu\text{m}$  thick are denoted in from the periphery and used by HALO to measure fragment dimensions. The area  $A_i\mu\text{m}^2$  of the  $i$ th band is used to determine the radius  $R = R_1\mu\text{m}$  of the slice. (C)-(F) An approximation for the radius of each slice ( $R_1$ ) was calculated using the area of the  $i$ th band,  $A_i\mu\text{m}^2$  (B) for (C) patient 1098 ( $n = 2, t = 0$ ), and (D) patient 1167 ( $n = 2, t = 0$ ). The different coloured bars represent different slices for each patient. The combined mean radius across all samples was  $2009.8\mu\text{m}$ . Dotted line: mean radii for slices 1098 and 1167. Repeating this calculation for both patients control slices at 0, 24, 48 and 72 hours gives (E) the mean radius and (F) the total surface area. Each circle represents a distinct slice and the dotted line is the mean.

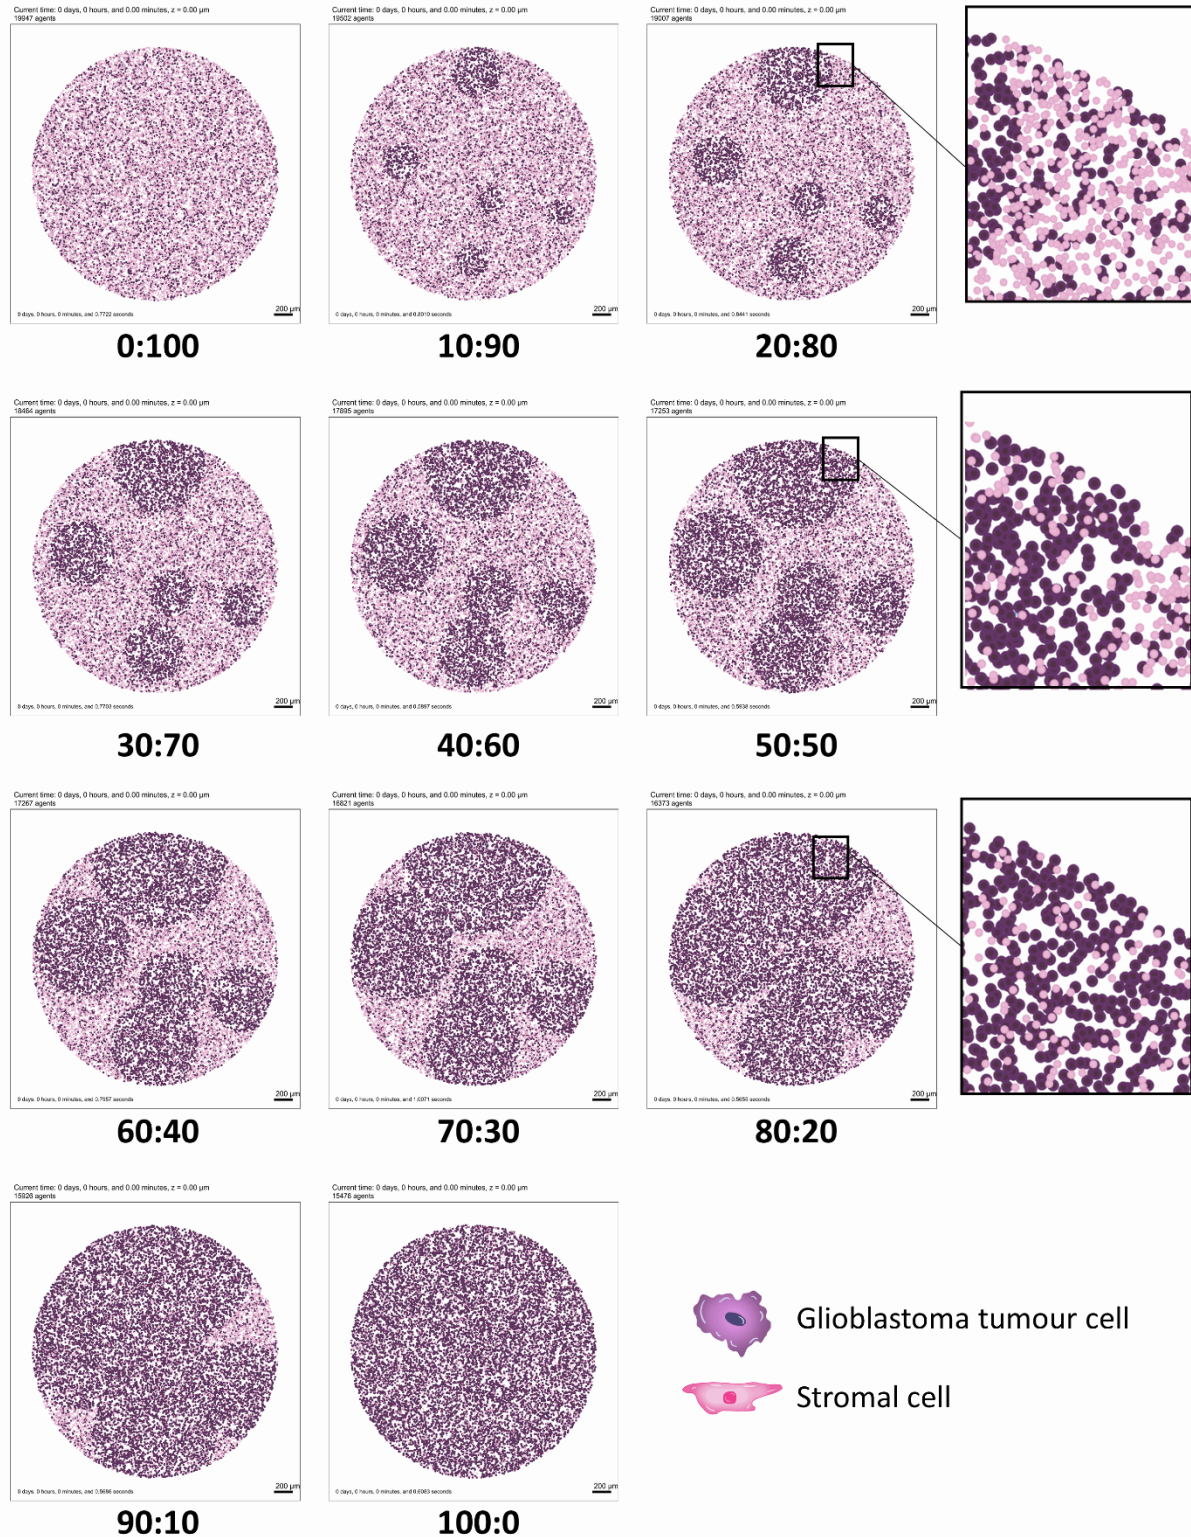

**Figure S11 Spatial configurations for the dense:sparse tumour tissue, related to Figure 4.** Using clinical pathologist scores for patient-derived glioblastoma tissue (Figure 2B) we generated a configuration of tumour cells to stromal cells that make up a ‘dense’ sample and a ‘sparse’ sample (Table 2). In the above, a dense tumour tissue corresponds to 100:0 and a fully sparse tumour tissue corresponds to 0:100.



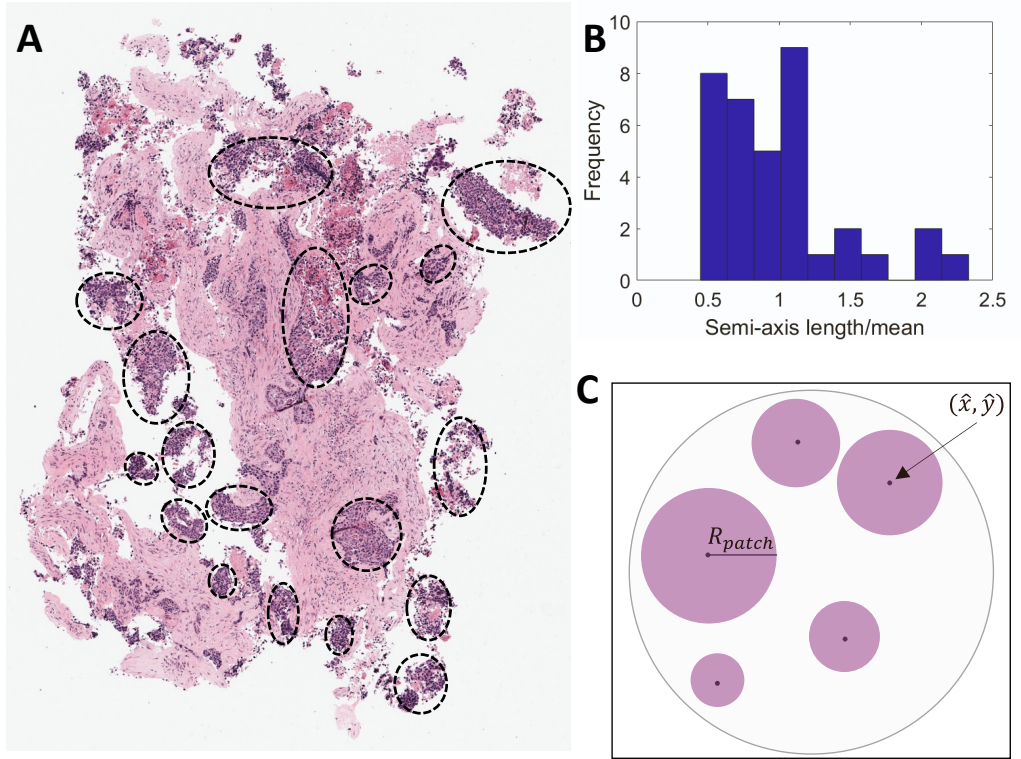

**Figure S12. Generating patchy slices consisting of dense & sparse regions, related to Figure 4.** (A) Patient-derived glioblastoma tumour slice stained for stromal cells (pink) and glioblastoma cells (purple). Sections of dense glioblastoma cell populated areas were approximated with ellipses (black dashed lines). (B) Histogram of the normalized semi-axis lengths of the ellipses denoted in (A). The normalized semi-axis lengths were determined by dividing each semi-axis by the average of all the semi-axis measured. (C) Schematic describing the generation of patchy tumours. The centre of patches  $(\hat{x}, \hat{y})$  were determined by sampling from a uniform distribution for the distance and angle from the patch centre. The radius of each patch  $R_{patch}$  was then determined by sampling from a normal distribution inferred from (B).

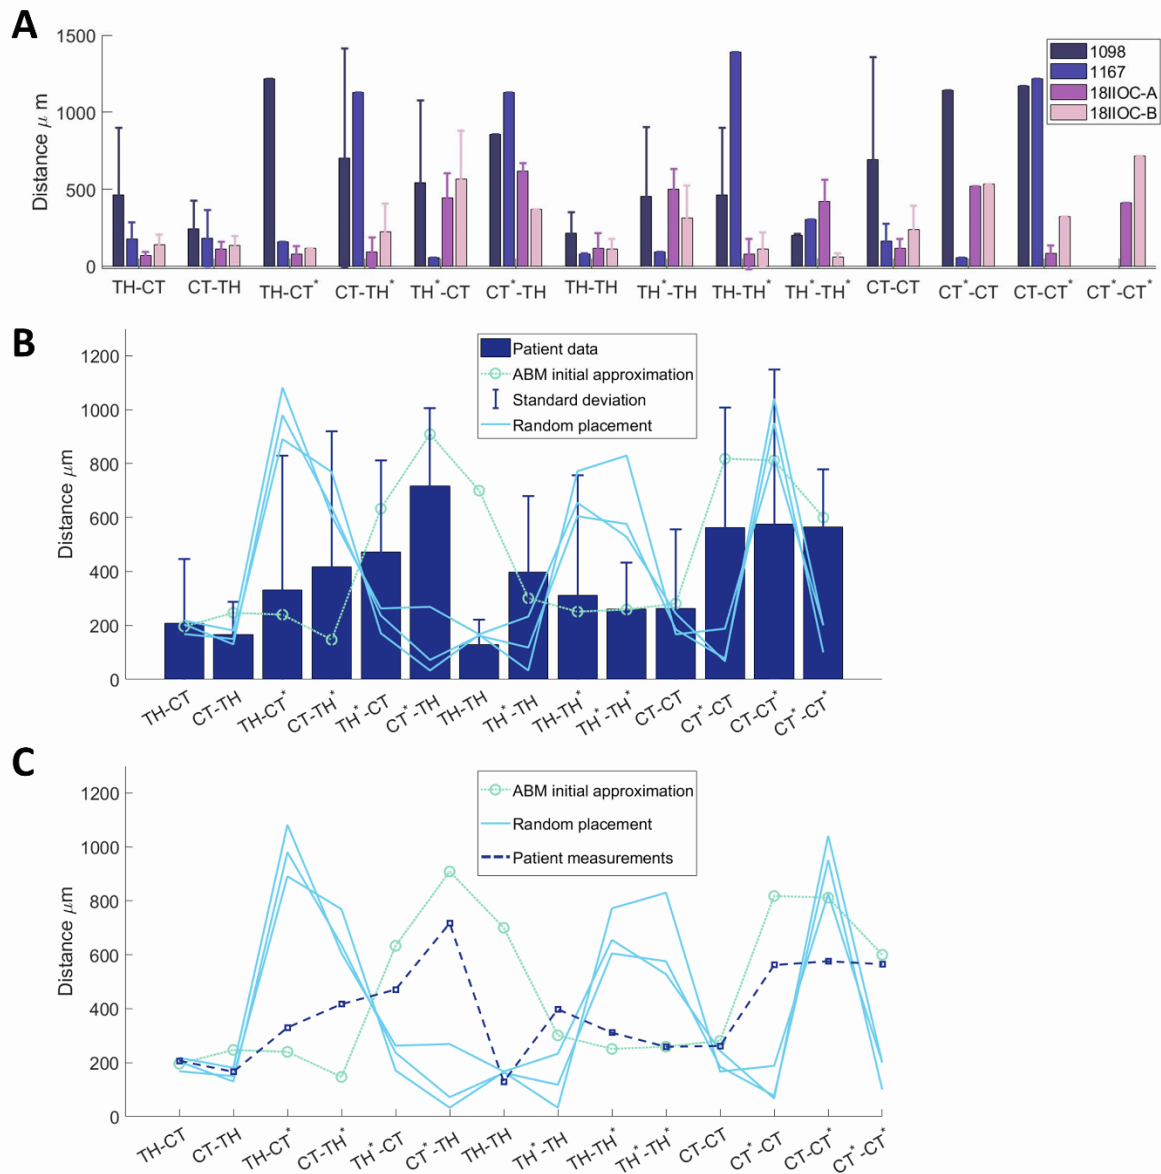

**Figure S13. Nearest neighbour distances between CD4+ (TH) and CD8+ (CT) T cells in patients 1098, 1167, 18IIOC-A and 18IIOC-B, related to Figure 3.** (A) Histogram of each cell-cell relationship for each patient (1098, 1167, 18IIOC-A and 18IIOC-B). Ki67+ proliferative (\*) and Ki67-non-proliferative subsets of cells were noted and for each cell-cell pair relationship, the distance from a randomly chosen cell of the first type to its nearest neighbour of the second type was calculated. Error bars for the standard deviation in the immune cell distances across all patient slices where patient 1098 had  $n = 20$ , patient 1167 had  $n = 20$ , patient 18IIOC-A had  $n = 23$ , and patient 18IIOC-B had  $n = 18$ . Histogram of mean cell-cell distance relationship across all patient slices is given in **Figure 3B**. TH: CD4+ T; CT: CD8+ T cells. Proliferative (Ki67+) are denoted by \* (B)-(C) Comparison of nearest neighbour distances from the Hooke's law simulation with random initial placement. Three instances of random initial placement have been plotted where the nearest neighbours were measured and averaged. The single iteration of Hooke's law from (A) and **Figure 3B** in the main text is overlaid as well as the patient data average. The plots in (C) and (D) are recreations of each other with and without the standard deviation and with the bar graph replaced by a line plot.

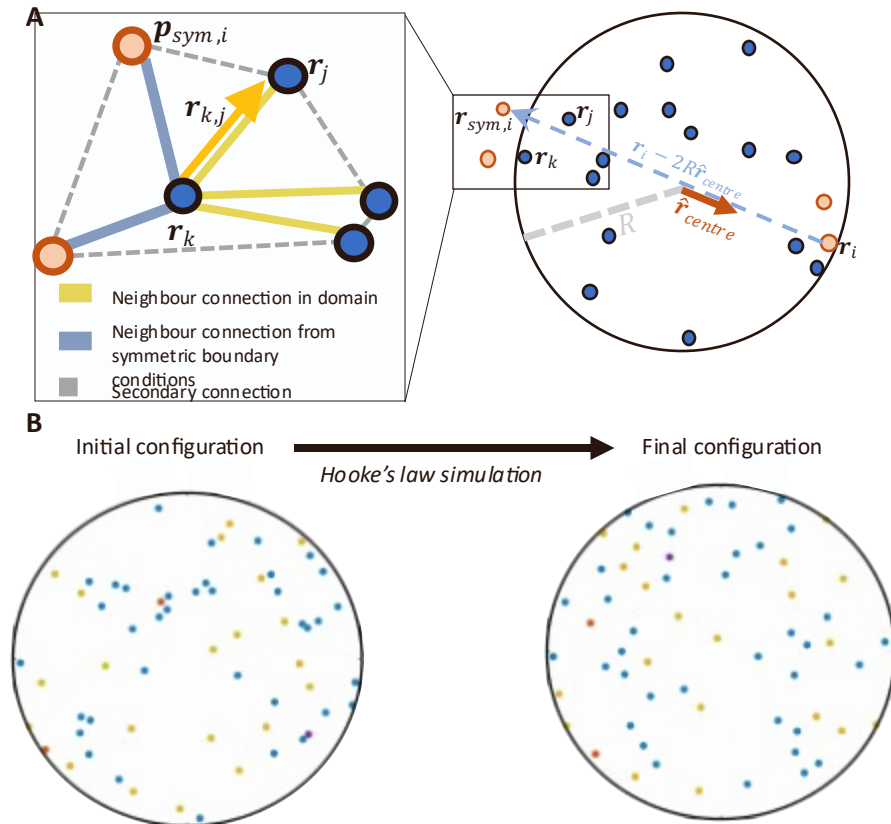

**Figure S14. Simulating Hooke's law to determine initial spatial configuration of CD4+ T cells and CD8+ T cells, related to Figure 3.** (A) Schematic for the ABM model that provides the initial distribution of immune cells. For a point  $r_k$ , the nearest neighbours are determined using a Delaunay triangulation. The vector  $r_{k,j}$  is the vector connecting point  $r_k$  with its neighbour point  $r_j$  and is used to calculate the movement of this point governed by Hooke's law (Eq. 3). In this scenario, the point  $r_k$  is close to the boundary, and so has neighbour points which arise due to symmetric boundary conditions (i.e.,  $r_{sym,i}$ ). All points within the circle have a duplicate point outside the circle that is located diagonally on the exterior of the circle and used as part of the Delaunay triangulation. (B) The resulting configuration of THs (blue), THs\* (orange), CTs (yellow), CTs\* (purple) after the Hooke's law simulation, where the stopping criterion was that the distance cells have moved in  $\Delta t$  is less than  $5\mu m$ . For the average minimum distance between each cell type TH, TH\*, CT and CT\* after a single simulation of the Hooke's law simulation see Figure 3B.

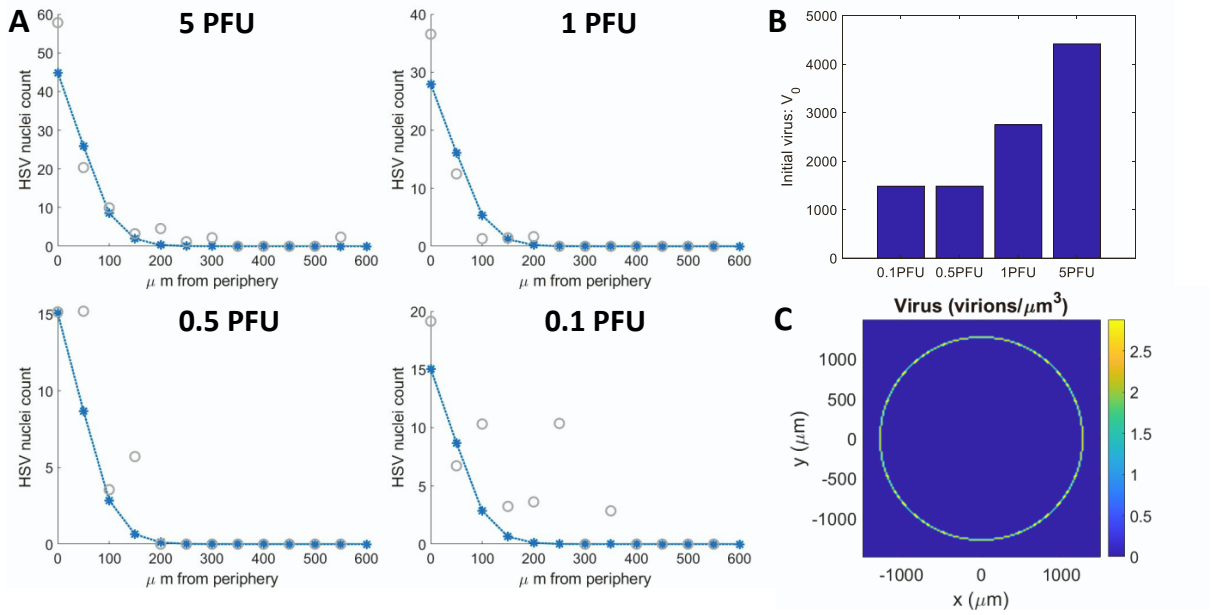

**Figure S15. Fitting extracellular viral diffusion and decay to GFP infiltration measurements, related to Figure 3.** (A) HSV nuclei counts measured at 24 hours for 5 PFU, 1 PFU, 0.5 PFU, and 0.1 PFU. Eq. 6 was fit to these measurements by assuming the initial size of the viral population varied between the different PFU experiments but that the diffusion coefficient ( $D_{virus}$ ) and the decay rate ( $\lambda_{virus}$ ) were fixed across the different experiments. Grey circles: observed data. Dotted blue line: Model fit. Stars: Model prediction at the equivalent band at a given distance from the periphery. (B) Bar plot for the different initial virus PFUs obtained from the fit to the different PFU. (C) Initial virus density at the edge of the tumour slice, estimated using Eq. 1 at 5 PFU.

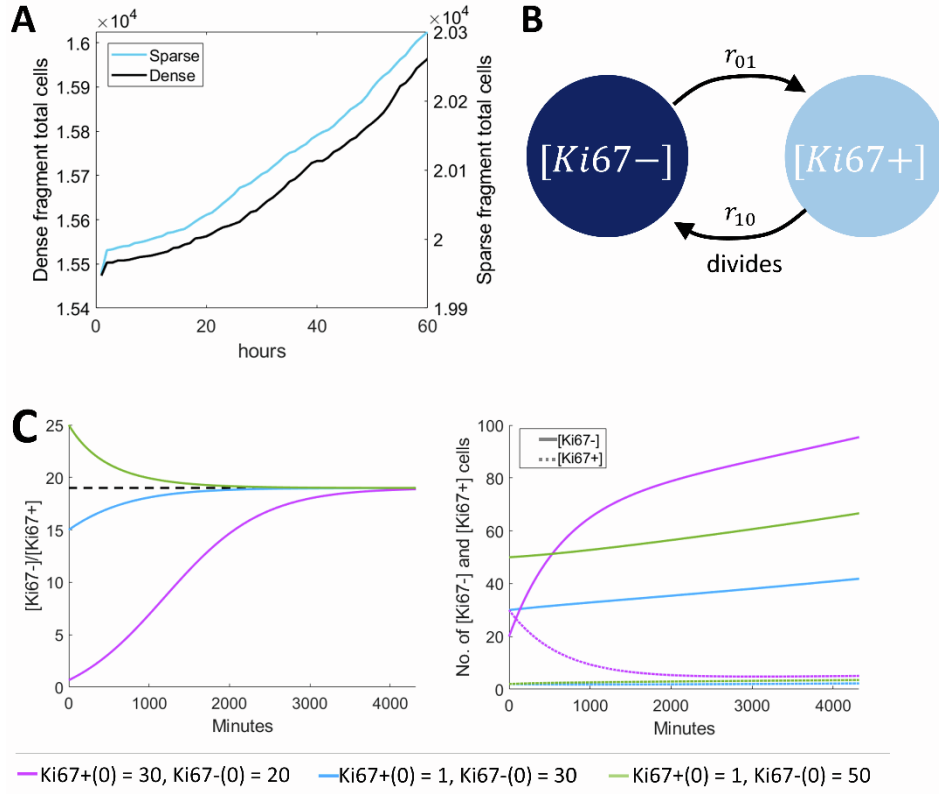

**Figure S16. Glioblastoma, Ki67+ and Ki67- cell growth in the model, related to Figure 3.** (A) Glioblastoma tumour cell numbers in dense (black) and sparse (blue) tumour slices over time predicted from our PhysiCell model simulation without virus. Parameter values for the proliferation of glioblastoma cells are in **Table S2** and were obtained by fitting to cell count measurements from Mercurio et al. (87) (**Figure 3C Main Text**). (B) The Ki67 Basic proliferation model inbuilt in PhysiCell. In this model, cells are either in a non-proliferative (Ki67-) or proliferative (Ki67+) state. Cells transition from a non-proliferative to proliferative state at a rate  $r_{01}$  and cells transition from a proliferative to a non-proliferative state and divide at a rate  $r_{10}$ . (C) For different initial conditions, the ratio of non-proliferative (Ki67-) and proliferative (Ki67+) cells (left) and the explicit number (right) were plotted. The different initial conditions are given in the legend and correspond to different line colours. The number of Ki67- and Ki67+ cells (right) are represented by a solid and dashed line, respectively. These plots summarise the stable nature of the T cell proliferation model.

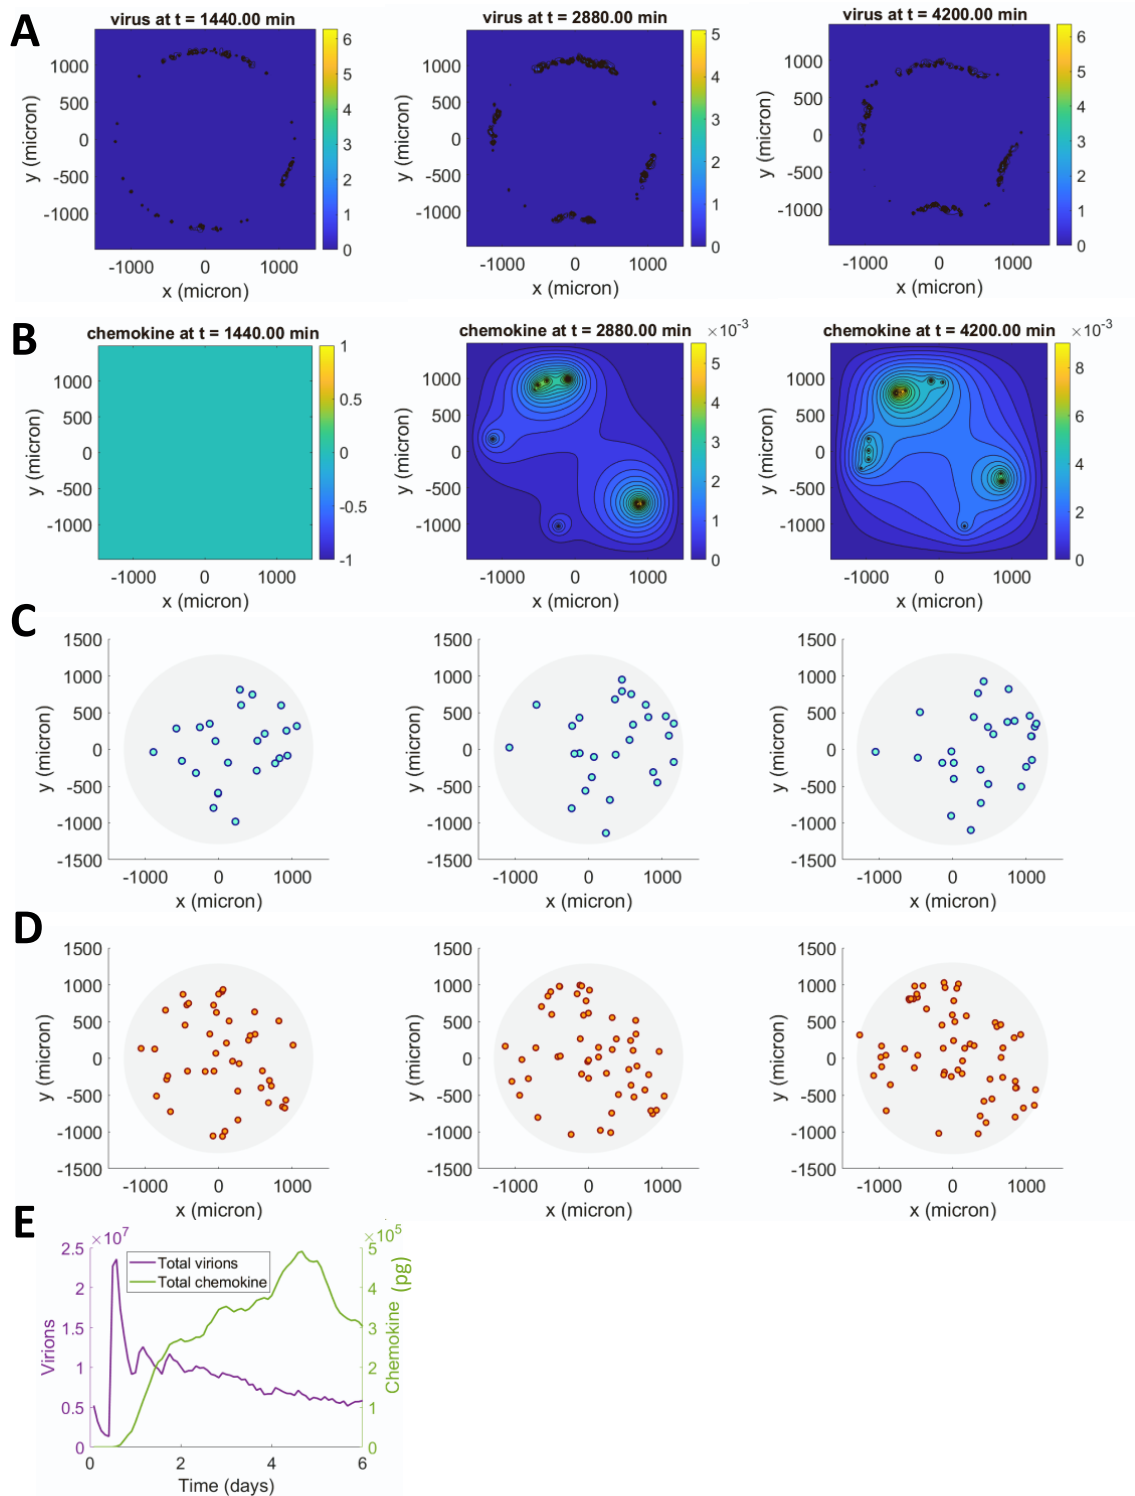

**Figure S17. Density of chemokine and extracellular virus (patchy tumour slices with 50% dense and 50% sparse regions), related to Figure 4.** Contour plots for the spatial density of (A) extracellular virus and (B) chemokine at Left: 24 hours, Middle: 48 hours, and Right: 72 hours. Corresponding location of (C) CD8+T cells and (D) CD4+T cells at Left: 24 hours, Middle: 48 hours, and Right: 72 hours. (E) Total virions and chemokine (pg) in the tumour slice over 6 days.

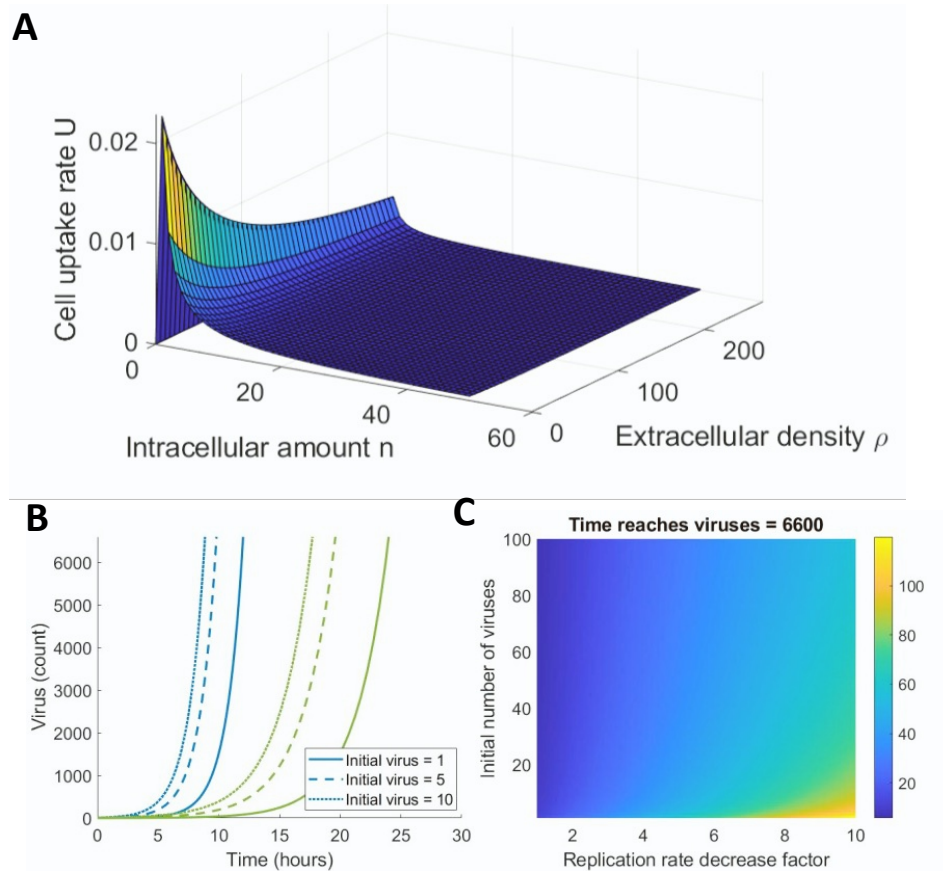

**Figure S18. Exploration of the viral binding and replication models, related to Figure 2.** (A) The binding rate of the virus for each cell as a function of the intracellular amount of virus within that cell  $m(t)$  and the extracellular density of virus  $\rho(t)$  (Eqs. 10-11, STAR Methods). (B) and (C) Intracellular viral counts for different initial virus infections ( $m_i(0) = 1, 5, 10$ ) with virus replicating according to Eq. 9. (C) The impact of decreasing the replication rate on the time taken to reach 6600 intracellular virions.

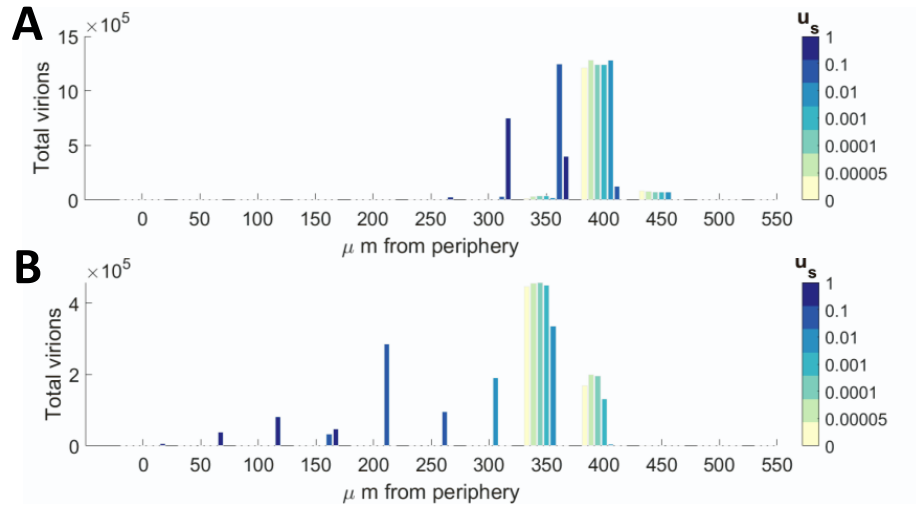

**Figure S19. Increasing the inhibition of stroma has a significant impact on infiltration in glioblastoma, related to Figure 6.** The total intracellular virus in glioblastoma cells in 50µm bands after 72 hours at the given distance from the periphery of the tumour slice for different stromal-virus binding rates ( $u_s$ ) in (A) dense and (B) sparse tumours. The colour of the bar corresponds to the stromal-virus binding rate. Corresponding percentage of tumour remaining is in **Figure 6D** in the Main Text.



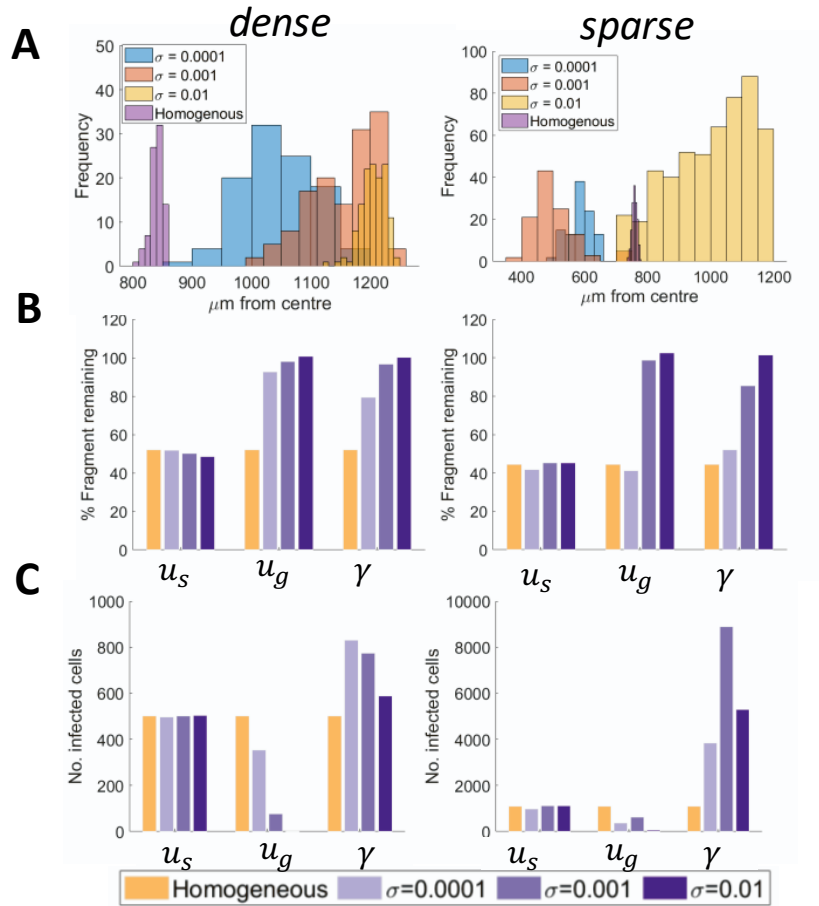

**Figure S20. Impact of heterogeneity in viral replication and binding rates on viral infiltration and cell counts, related to Figure 6.** Heterogeneity was introduced into parameters  $\gamma$ ,  $u_s$  and  $u_g$  by assigning each cell a value drawn from a gamma distribution with mean as the original parameters value (i.e.  $\gamma = 0.0081$ ,  $u_s = 0.01$  and  $u_g = 0.002$ ) and variance  $\sigma = 0.0001, 0.001$ , and  $0.01$  (A) Distance of infiltration ( $\mu\text{m}$ ) of infected cells was measured in sparse and dense tumours for varying variances on the replication rate  $\gamma$  distribution. (B) Percent of the initial tumour slice remaining at 72 hours in sparse and dense tumours for varying values of the stromal cell binding rate  $u_s$ , glioblastoma cell binding rate  $u_g$ , and viral replication rate  $\gamma$ . (C) Corresponding number of infected cells to (B). Left column: results in dense tissue slices; Right column: results in sparse tissue slices.

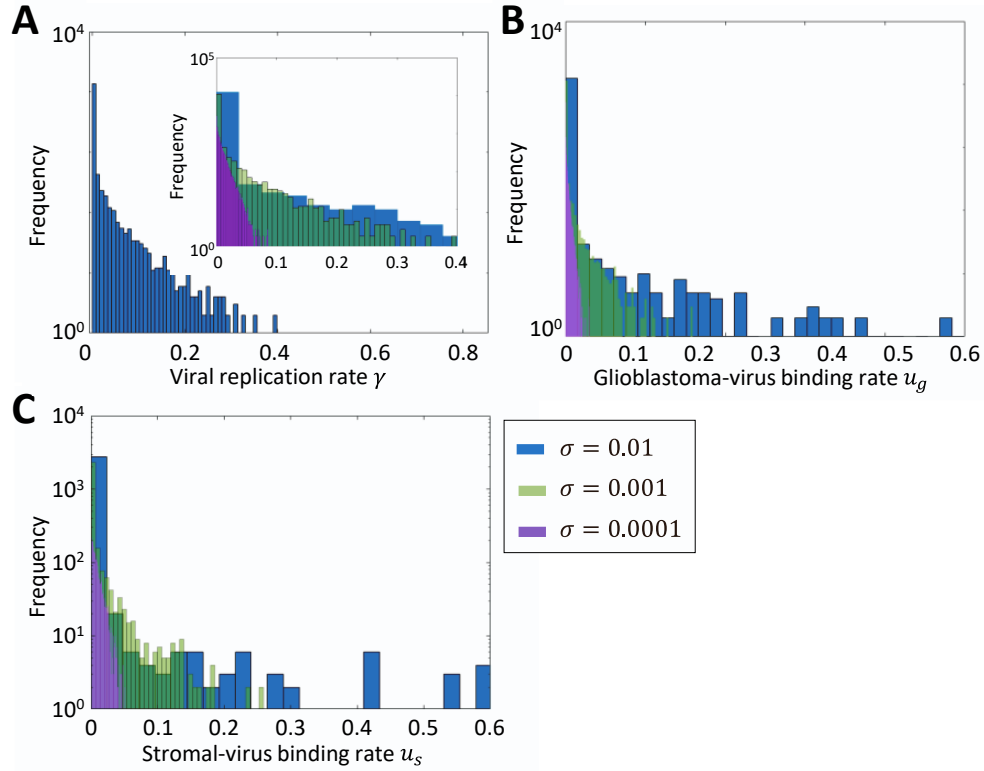

**Figure S21. Corresponding gamma distributions for parameter values in Figure S8, related to Figure 6.** Gamma distributions used to define parameter values: (A) viral replication rate  $\gamma$ , (B) glioblastoma cell binding rate  $u_g$ , and (C) stromal cell binding rate  $u_s$ . Histograms of the different parameters are given for variance  $\sigma = 0.0001$  (purple),  $\sigma = 0.001$  (green) and  $\sigma = 0.01$  (blue).

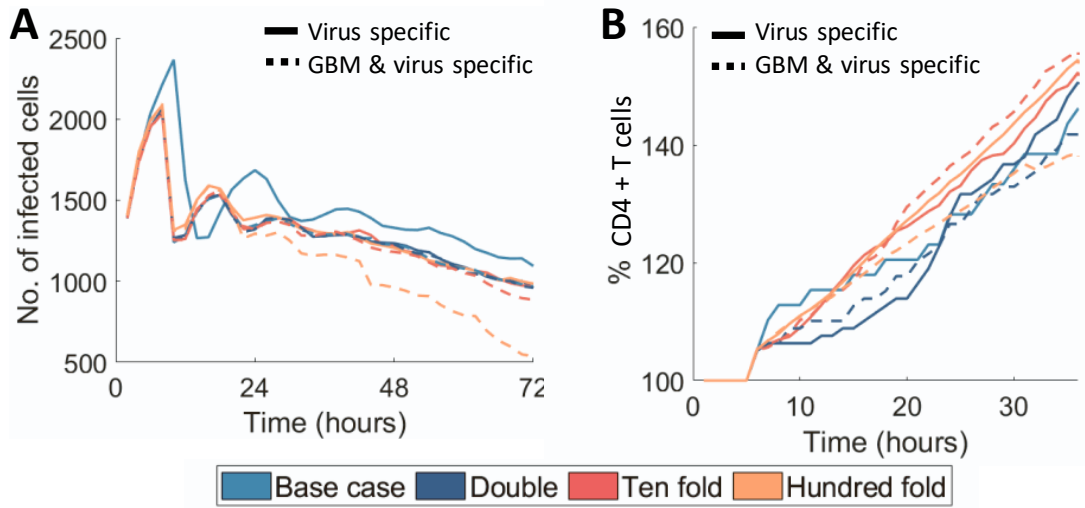

**Figure S22. Infected cells over 72 hours with changes in CD8+ & CD4+ T cell numbers and antigen specificity, related to Figure 6.** The number of CD4+ and CD8+ T cells was increased two-times, ten-times and one hundred-times from the base case. (A) Infected cell number and (B) CD4+ T cell number over time for varying immune cell multiplicities. The corresponding percentage of tumour remaining at 72 hours is given in **Figure 6A** in the Main Text. Virus-specific: CD8+ T cells induce apoptosis in infected cells only or glioblastoma; Virus specific: CD8+ T cells induce apoptosis in both uninfected and infected cells (see Main Text).

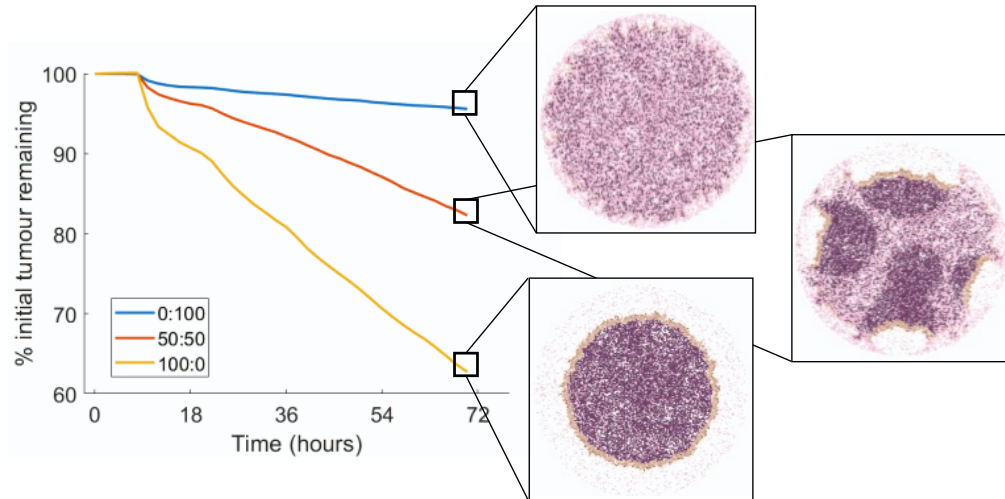

**Figure S23. Predicting treatment efficacy on varying stromal densities, related to Figure 7.** The percentage of the initial tumour slice remaining over 72 hours with corresponding model snapshot (for results in **Figure 7A** in Main Text). In these simulations, the stromal-virus binding rate was set as  $u_s = 1$ . Yellow curve: 100:0 dense:sparse; Red curve: 50:50 dense:sparse; Blue curve: 0:100 dense:sparse.

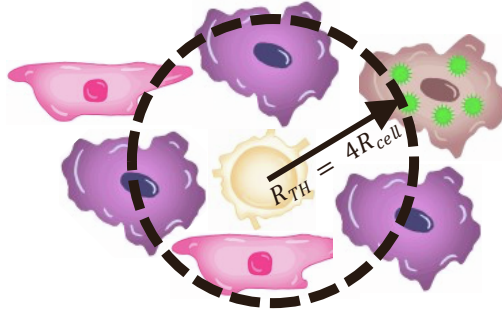

**Figure S24. Estimating the neighbourhood and secretion rate of chemokine for CD4+ T cells, related to Figure 2.** Schematic summary of the neighbourhood ( $\Pi$ ) defined as the cells within a distance  $R_{TH}$  of a particular CD4+T cell.

**Table S1. Values of the tumour slice area correction factor  $\kappa$ , related to Figure 4.** Tumour slices were generated with dense and sparse regions in an area ratio of dense:sparse. The radius of each dense patch was scaled by  $\kappa$  to obtain the correct area ratio (**Figure S5**). The number of GBM cells ( $N_{GBM}$ ) and stromal cells ( $N_{stroma}$ ) for different ratios of dense:sparse are also given above.

| Density of tumour slice<br>(dense:sparse) | Area correction factor<br>( $\kappa$ ) | $N_{GBM}$ | $N_{stroma}$ |
|-------------------------------------------|----------------------------------------|-----------|--------------|
| 10:90                                     | 0.4080                                 | 5641      | 14306        |
| 20:80                                     | 0.5922                                 | 6402      | 13100        |
| 30:70                                     | 0.7380                                 | 7100      | 11907        |
| 40:60                                     | 0.8625                                 | 7797      | 10687        |
| 50:50                                     | 1.000                                  | 8495      | 9400         |
| 60:40                                     | 1.088                                  | 9192      | 8584         |
| 70:30                                     | 1.208                                  | 9890      | 7377         |
| 80:20                                     | 1.350                                  | 10589     | 6232         |
| 90:10                                     | 1.568                                  | 11285     | 5088         |

**Table S2. Model parameters and variables, related to Table 1.** All relevant model parameters and variables are summarized below. For parameters with a fixed value, their value has been noted below, and remaining variables or un-fixed parameters have been noted in the second table with the size of vectors. The reference for each parameters value is given.

| Symbol          | Units                       | Description                             | Value                 | Ref<br>(see Main<br>Text)                           |
|-----------------|-----------------------------|-----------------------------------------|-----------------------|-----------------------------------------------------|
| $A_{frag}$      | mm <sup>2</sup>             | Total area of tumour slice              | 5.0644                | <b>Figure S10</b>                                   |
| $\alpha$        | virions                     | Virus burst size                        | 6600                  | Lambright et al. (2000)                             |
| $\beta$         | 1/min                       | Tumour cell proliferation rate          | $7.35 \times 10^{-4}$ | <b>Figure 3C</b>                                    |
| $c_j^{ccr}$     | $\mu\text{m}/\text{min}$    | Cell-cell repulsive force coefficient   | 10                    | Macklin et al. (2012)                               |
| $c_s$           | $\mu\text{g}/\text{hour}^2$ | Spring constant                         | 0.01                  | Jenner et al. (2020)                                |
| $D_{virus}$     | $\mu\text{m}^2/\text{min}$  | Diffusion coefficient for virus         | 1.4766                | <b>Figure S15</b>                                   |
| $D_{chemokine}$ | $\mu\text{m}^2/\text{min}$  | Diffusion coefficient for chemokine     | 555.56                | Matzavinos et al. (2004)                            |
| $d_{attach}$    | $\mu\text{m}$               | CD8+ T to infected attach cell distance | 50                    | Estimated                                           |
| $\delta_v$      | 1/min                       | Release rate of virus                   | 0.1466                | Nakashima et al. (2018),<br>Lambright et al. (2000) |

|                       |                                      |                                           |                       |                                                     |
|-----------------------|--------------------------------------|-------------------------------------------|-----------------------|-----------------------------------------------------|
| $\epsilon$            | $\mu\text{m}$                        | Length of voxel                           | 20                    | Ghaffarizadeh et al. (2018) and (2015)              |
| $\eta$                | $\mu\text{m hour}$                   | Velocity of proportionality               | 0.133                 | Jenner et al. (2020)                                |
| $f_F$                 | dimensionless                        | Fluid fraction of the cell                | 0.75                  | Ghaffarizadeh et al. (2018)                         |
| $\gamma$              | 1/min                                | Virus replication rate                    | 0.4886                | Nakashima et al. (2018) and Lambright et al. (2000) |
| $K_V$                 | $\mu\text{m}^3$                      | Tumour volume carrying capacity           | $1.58 \times 10^{14}$ | Stensj oen et al. (2015) and (2018)                 |
| $K_C$                 | cells                                | Tumour cell number carrying capacity      | $4.76 \times 10^6$    | <b>Figure 3C</b>                                    |
| $\lambda_{virus}$     | 1/min                                | Decay rate for virions                    | 0.0029                | <b>Figure S15</b>                                   |
| $\lambda_{chemokine}$ | 1/min                                | Decay rate for chemokine                  | $8.06 \times 10^{-6}$ | Reisenberger et al. (1996)                          |
| $m_{1/2}$             | virions                              | Infection threshold half-effect           | 10                    | estimated Lambright et al. (2000)                   |
| $\mu$                 | $\mu\text{m}$                        | Average patch radius                      | 402                   | <b>Figure S12</b>                                   |
| $N_{CD4}$             | cells                                | Number of CD4 cells                       | 39                    | <b>Figure 3A</b>                                    |
| $N_{CD8}$             | cells                                | Number of CD8 cells                       | 22                    | <b>Figure 3A</b>                                    |
| $v_{max}$             | $\mu\text{m}/\text{min}$             | Maximum speed of CD8+ T cells             | 24.6                  | Bhat et al. (2017)                                  |
| $v^*$                 | $\text{pg}/\mu\text{m}$              | Chemokine speed half-concentration        | 0.005                 | Estimated                                           |
| $p_{max}$             | $1/\mu\text{m} \text{ 1}/\text{min}$ | Maximum proliferation pressure            | 5.99782               | Macklin et al. (2012) and Hyun et al. (2013)        |
| $\bar{p}_{max}$       | dimensionless                        | Maximum proliferation ‘‘simple pressure’’ | 219.79                | Macklin et al. (2012) and Hyun et al. (2013)        |
| $R$                   | $\mu\text{m}$                        | Radius of tumour slice                    | 1269.7                | <b>Figure S10</b>                                   |

|                      |                          |                                            |                      |                                                               |
|----------------------|--------------------------|--------------------------------------------|----------------------|---------------------------------------------------------------|
| $R_{GBM}$            | $\mu\text{m}$            | Radius of a glioblastoma cell              | 10.8                 | Oraïopoulou et al. (2017)                                     |
| $R_{CD4}$            | $\mu\text{m}$            | Radius of a CD4+ T cell                    | 3.6                  | Tasnim et al. (2018), Wang et al. (2014) and Du et al. (2017) |
| $R_{CD8}$            | $\mu\text{m}$            | Radius of a CD8+ T cell                    | 3.6                  | Tasnim et al. (2018), Wang et al. (2014) and Du et al. (2017) |
| $R_{stromal}$        | $\mu\text{m}$            | Radius of a stromal cell                   | 7.5                  | Freitas et al. (1999)                                         |
| $r_{01,CD4}$         | 1/min                    | Transition from Ki67- to Ki67+             | $7.9 \times 10^{-5}$ | <b>Figure S16</b>                                             |
| $r_{01,CD8}$         | 1/min                    | Transition from Ki67- to Ki67+             | $7.2 \times 10^{-5}$ | <b>Figure S16</b>                                             |
| $r_{10}$             | 1/min                    | Division rate                              | 0.00143              | Kinjyo et al. (2015)                                          |
| $\rho_{virus}^*$     | amount/ $\mu\text{m}^3$  | Virus saturation concentration             | 268.51               | Krol et al. (1999) and Dreher et al. (2006)                   |
| $\rho_{chemokine}^*$ | amount/ $\mu\text{m}^3$  | Chemokine saturation concentration         | 5                    | <b>Figure 3E</b>                                              |
| $\rho_{max}$         | virions/ $\mu\text{m}^3$ | Maximum binding density                    | 0.0125               | Estimated                                                     |
| $S_{chemokine}$      | 1/min                    | Secretion rate from CD4+ T cells           | 0.0417               | <b>Figure 3E</b>                                              |
| $\sigma$             | dimensionless            | Standard deviation for patch radius        | $0.4742\mu$          | <b>Figure S12</b>                                             |
| $\tau$               | min                      | Attached time CD8+ T cell to infected cell | 50                   | Halle et al. (2016)                                           |
| $u_g$                | 1/min $1/\mu\text{m}^3$  | Binding rate virus by glioblastoma cells   | 0.0020276            | <b>Figure S15</b>                                             |
| $u_s$                | 1/min $1/\mu\text{m}^3$  | Binding rate of virus by Stromal cells     | 0.01                 | Estimated                                                     |
| $V_0$                | virions/ $\mu\text{m}^3$ | Initial concentration of virus (main text) | 3.0248               | <b>Figure S15</b>                                             |
| $V_{N,GBM}$          | $\mu\text{m}^3$          | Total nuclear volume (glioblastoma cell)   | 740                  | Kouwenberg et al. (2018)                                      |
| $V_{N,CD4}$          | $\mu\text{m}^3$          | Total nuclear volume (CD4+ T cell)         | 95.2                 | Rossi et al. (2019)                                           |



|                 |                              |                                     |        |                             |
|-----------------|------------------------------|-------------------------------------|--------|-----------------------------|
| $V_{N,CD8}$     | $\mu\text{m}^3$              | Total nuclear volume (CD8+ T cell)  | 96.2   | Rossi et al. (2019)         |
| $V_{N,stromal}$ | $\mu\text{m}^3$              | Total nuclear volume (Stromal cell) | 500    | Ghaffarizadeh et al. (2018) |
| $\xi$           | $\text{cells}/\mu\text{m}^2$ | Density of tumour slice             | 0.9398 | <b>Figure 3C</b>            |

| Variables             | Units                      | Description                                                       | Size | Variables    |
|-----------------------|----------------------------|-------------------------------------------------------------------|------|--------------|
| $A_i$                 | $\mu\text{m}^2$            | Area of the $i$ th band (where $i \in 1: N_b$ )                   |      | $1 \times 1$ |
| $A_{cell}$            | $\mu\text{m}^2$            | Surface area of cell                                              |      | $1 \times 1$ |
| $b$                   | dimensionless              | Chemotaxis bias parameter ( $0 < b < 1$ )                         |      | $1 \times 1$ |
| $\mathbf{D}$          | $\mu\text{m}^2/\text{min}$ | Vector of diffusion coefficients                                  |      | $2 \times 1$ |
| $d_i$                 | $\mu\text{m}$              | Distance of cell from centre of the patch                         |      | $1 \times 1$ |
| $d_{patch}$           | $\mu\text{m}$              | Distance of patch centre from tumour slice centre                 |      | $1 \times 1$ |
| $\mathbf{d}^{bias}$   | dimensionless              | Bias direction                                                    |      | $1 \times 1$ |
| $F_{i,j}^{CCR}$       | $\mu\text{m}/\text{min}$   | Cell $i$ -cell $j$ repulsive force                                |      | $1 \times 1$ |
| $f_{CN}$              | dimensionless              | “target” cytoplasmic to nuclear volume ratio                      |      | $1 \times 1$ |
| $Ki67^-$              | cells                      | Number of non-proliferative cells                                 |      | $1 \times 1$ |
| $Ki67^+$              | cells                      | Number of proliferative cells                                     |      | $1 \times 1$ |
| $\kappa$              | dimensionless              | Area correction factor                                            |      | $1 \times 1$ |
| $\lambda$             | $1/\text{min}$             | Vector of decay rates                                             |      | $2 \times 1$ |
| $m_i$                 | virions                    | Amount of intracellular virus in cell $i$                         |      | $1 \times 1$ |
| $N_b$                 | dimensionless              | Number of bands                                                   |      | $1 \times 1$ |
| $N_{GBM}$             | cells                      | Number of glioblastoma cells                                      |      | $1 \times 1$ |
| $N_{stromal}$         | cells                      | Number of stromal cells                                           |      | $1 \times 1$ |
| $n$                   | Samples                    | Number of patients/tissue samples                                 |      | $1 \times 1$ |
| $v$                   | $\mu\text{m}/\text{min}$   | Base cell speed                                                   |      | $1 \times 1$ |
| $\Omega$              | dimensionless              | Relative ratio of virus binding of glioblastoma and stromal cells |      | $1 \times 1$ |
| $\Pi(k)$              | dimensionless              | Set of points that neighbour point $k$                            |      | $n \times 1$ |
| $\bar{p}_i$           |                            | “simple pressure” on cell $i$                                     |      | $1 \times 1$ |
| $\psi$                | $\mu\text{m}/\text{min}$   | Migration speed                                                   |      | $1 \times 1$ |
| $\phi$                | dimensionless              | Random migration direction                                        |      | $2 \times 1$ |
| $R_i$                 | $\mu\text{m}$              | Radius of $i$ th band (where $i \in 1: N_b$ )                     |      | $1 \times 1$ |
| $R_{nucleus}$         | $\mu\text{m}$              | Radius of the nucleus                                             |      | $1 \times 1$ |
| $R_{cell}$            | $\mu\text{m}$              | Radius of a cell                                                  |      | $1 \times 1$ |
| $R_{patch}$           | $\mu\text{m}$              | Radius of patch                                                   |      | $1 \times 1$ |
| $\mathbf{r}_k$        | dimensionless              | Position of the $k$ th cell                                       |      | $2 \times 2$ |
| $\mathbf{r}_{i,j}$    | dimensionless              | Vector between the $i$ th and $j$ th cell                         |      | $2 \times 2$ |
| $\mathbf{r}_{centre}$ | dimensionless              | Vector between cell and centre of the tumour slice                |      | $2 \times 2$ |
| $r_{sym}$             | dimensionless              | Points symmetric to points within tumour slice domain             |      | $2 \times 1$ |
| $\rho$                | amount/ $\mu\text{m}$      | Vector of concentrations                                          |      | $2 \times 1$ |
| $\rho_{virus}$        | amount/ $\mu\text{m}$      | Concentration of virus                                            |      | $1 \times 1$ |
| $\rho_{chemokine}$    | amount/ $\mu\text{m}$      | Concentration of chemokine                                        |      | $1 \times 1$ |
| $\rho^*$              | amount/ $\mu\text{m}$      | Vector of saturation concentrations                               |      | $2 \times 1$ |
| $\mathbf{S}$          | $1/\text{min}$             | Vector of secretion rates                                         |      | $2 \times 1$ |
| $S_{virus}$           | $1/\text{min}$             | Secretion rate for virus                                          |      | $1 \times 1$ |
| $S_{chemokine}$       | $1/\text{min}$             | Secretion rate for chemokine                                      |      | $1 \times 1$ |
| $\mathbf{s}$          | $\mu\text{m}$              | Distances between immune types                                    |      | $1 \times 1$ |
| $T$                   | Min                        | Motility type persistence time                                    |      | $1 \times 1$ |

|                    |                   |                                                      |              |
|--------------------|-------------------|------------------------------------------------------|--------------|
| $t$                | min               | Time                                                 | $1 \times 1$ |
| $\theta_{cell}$    | radians           | Angle of individual cell from centre of tumour slice | $1 \times 1$ |
| $\theta_{patch}$   | radians           | Angle of patch from centre of tumour slice           | $1 \times 1$ |
| $\mathbf{U}$       | 1/min             | Vector of uptake (binding) rates                     | $2 \times 1$ |
| $U_{virus}$        | 1/min             | Uptake (binding) rate of virus                       | $1 \times 1$ |
| $U_{chemokine}$    | 1/min             | Uptake (binding) rate of chemokine                   | $1 \times 1$ |
| $u$                | 1/min $1/\mu m^3$ | Base virion binding rate by cells                    | $1 \times 1$ |
| $V_k$              | $\mu m^3$         | Volume of $k$ th cell                                | $1 \times 1$ |
| $V_N$              | $\mu m^3$         | Cell nuclear volume                                  | $1 \times 1$ |
| $V_S$              | $\mu m^3$         | Solid biomass volume                                 | $1 \times 1$ |
| $V_C$              | $\mu m^3$         | Total Cell cytoplasmic volume                        | $1 \times 1$ |
| $V_{NS}^*$         | $\mu m^3$         | “target” cell nuclear solid volume                   | $1 \times 1$ |
| $V_{CS}$           | $\mu m^3$         | Cell cytoplasmic solid volume                        | $1 \times 1$ |
| $\mathbf{v}_{mot}$ | Dimensionless     | Migration velocity vector                            | $2 \times 1$ |

---
